# Supplementary material
Source: PubMed Central journal article supplement (PMC2995491)

Figure S1

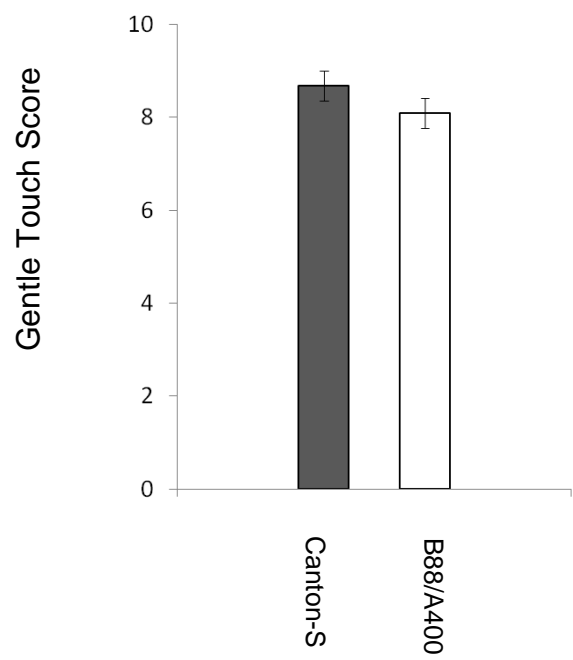

Figure S2

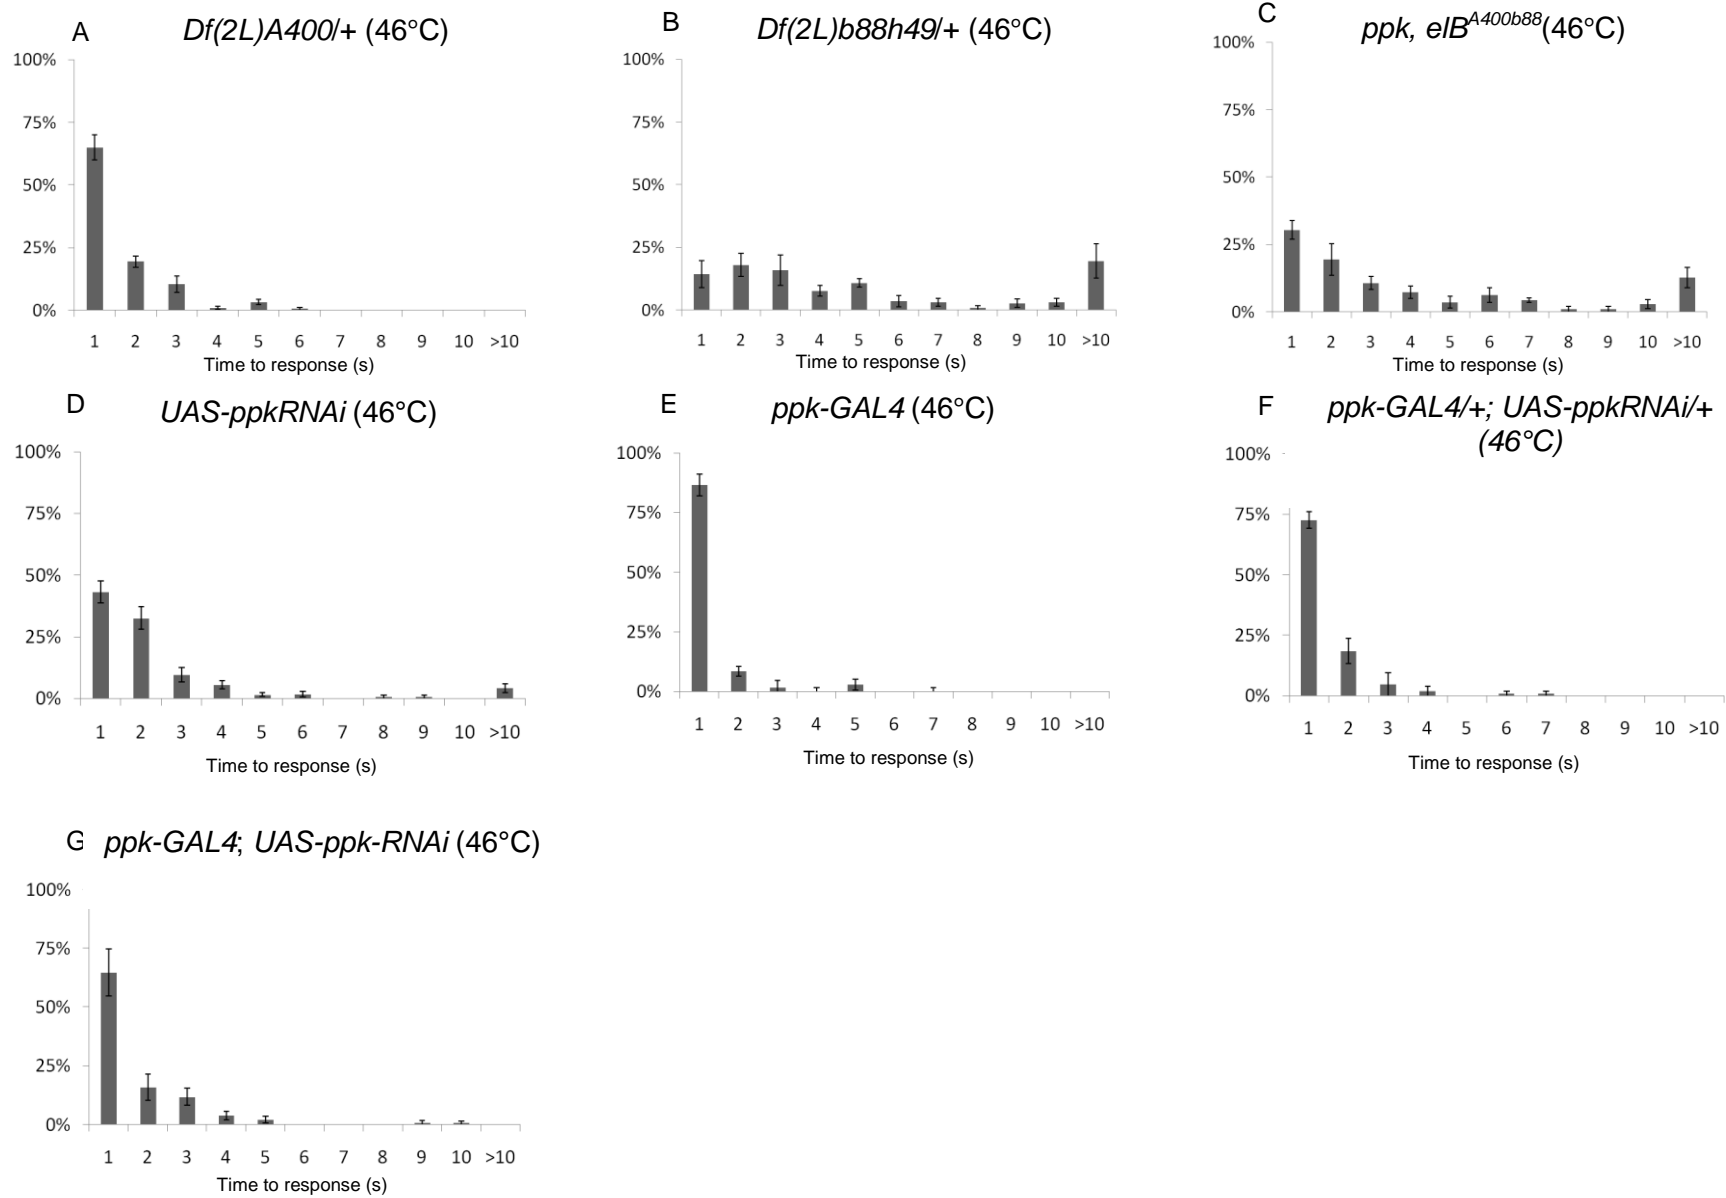

Supplement: NIHMS171885-supplement-01.pdf [file NIHMS171885-supplement-01.pdf]
